# Supplementary material for: Blood Metabolites and Faecal Microbial Communities in Nonpregnant and Early Gestation Ewes in Highly Cold Areas
Source: MDPI journal article supplement (doi:10.3390/biology12111436), 2023-11-16
Supplement: s1 [file s1]

# Blood Metabolites and Faecal Microbial Communities in Nonpregnant and Early Gestation Ewes in Highly Cold Areas

Zhiwu Wu <sup>1,2</sup>, Yanyan Yang <sup>3</sup>, Biao Wang <sup>3</sup>, Kefyalew Gebeyew <sup>1,2</sup>, Shaoxun Tang <sup>1</sup>, Xuefeng Han <sup>1,2\*</sup>, Zhixiong He <sup>1,2\*</sup>, Zhiliang Tan <sup>1,2</sup>

**Table S1.**

Ingredient and chemical composition of diet fed during the experiment (DM basis)

|                          | Formula concentrate |
|--------------------------|---------------------|
| <b>Ingredients, %</b>    |                     |
| Corn                     | 57.86               |
| Barley                   | 13.46               |
| Wheat bran               | 9.20                |
| Soybean meal             | 3.56                |
| Cottonseed meal          | 8.13                |
| Premix                   | 5.25                |
| Beet molasses            | 2.54                |
| Total                    | 100                 |
| <b>Nutritional level</b> |                     |
| DM (%)                   | 93.06               |
| ASH (%)                  | 8.03                |
| EE (%)                   | 9.78                |
| NDF (%)                  | 14.36               |
| ADF (%)                  | 4.96                |
| CP (%)                   | 17.78               |
| Ca (%)                   | 1.48                |
| P (%)                    | 0.68                |
| GE (MJ/Kg)               | 15.98               |

The premix is provided with: Iron 29.45 mg, copper 7.36 mg, zinc 38.65 mg, manganese 26.69 mg,

iodine 0.74 mg, cobalt 0.15 mg, selenium 0.06 mg, vitamin A 2310 IU, vitamin D 280 IU, vitamin E

23 IU per kg feed.
